# Supplementary material for: Multiple-Factors-Induced Rheumatoid Arthritis Synoviocyte Activation Is Attenuated by the α2-Adrenergic Receptor Agonist Dexmedetomidine
Source: MDPI journal article supplement (doi:10.3390/ijms241310756), 2023-06-28
Supplement: s1 [file s1]

# Multiple-Factors-Induced Rheumatoid Arthritis Synoviocyte Activation Is Attenuated by the $\alpha$ 2-Adrenergic Receptor Agonist Dexmedetomidine

Dongun Lee and Jeong Hee Hong \*

Department of Health Sciences and Technology, Lee Gil Ya Cancer and Diabetes Institute, GAIHST, Gachon University, 155 Getbeolro, Yeonsu-gu, Incheon 21999, Republic of Korea; sppotato1@gmail.com

\* Correspondence: minicleo@gachon.ac.kr; Tel.: +82-32-899-6682

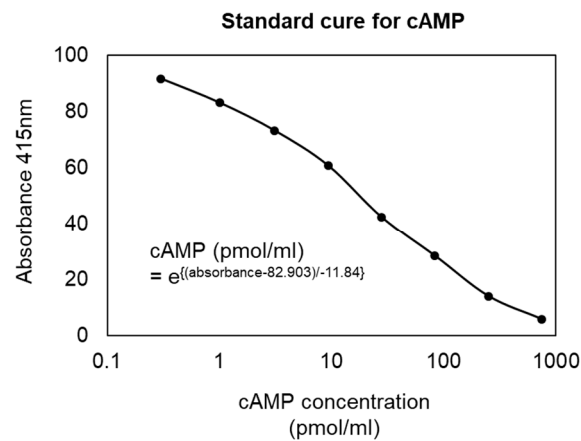

**Supplementary Figure S1. Standard curve for cAMP measurement.**

The standard curve for calculation of cAMP concentration by using cAMP ELISA kit.
